# Supplementary material
Source: publisher site journal article supplement (https://www.spandidos-publications.com/2939/downloadSupplementary)
Supplement: Supplementary file 1 [file downloadSupplementary]

## Sheet: A7966-40__S5B-116_X184.amplicon
Table SII. AmpliSeq RNA sequencing raw data.
contig_id	contig_srt	contig_end	region_id	gene_id	gc_count	overlaps	fwd_cov	rev_cov	total_reads	fwd_reads	rev_reads	RPM
NM_152438	344	448	AMPL36465175	DDX11	54	3	0	0	3	0	3	4.228
NM_003600	1195	1297	AMPL11289894	AURKA	56	27	0	1	27	26	1	38.052
NM_000077	667	772	AMPL4089136	CDKN2A	73	257	115	138	255	115	140	359.38
NM_005938	767	876	AMPL29422390	FOXO4	59	276	153	114	276	158	118	388.976
NM_134424	621	723	AMPL16353693	RAD52	47	294	126	166	294	127	167	414.344
NM_000051	5632	5733	AMPL2143252	ATM	37	803	366	414	802	376	426	1130.29
NM_022406	379	478	AMPL35402907	XRCC4	33	808	375	401	807	393	414	1137.33
NM_152463	1596	1704	AMPL34482490	EME1	59	820	456	345	820	465	355	1155.65
NM_001033855	707	814	AMPL3568418	DCLRE1C	45	909	489	375	905	516	389	1275.45
NM_002439	3325	3426	AMPL8534199	MSH3	35	1549	614	902	1543	629	914	2174.6
NM_003884	784	882	AMPL27733081	KAT2B	55	1555	558	952	1549	571	978	2183.06
NM_001238	1005	1106	AMPL7555808	CCNE1	44	1671	787	720	1593	842	751	2245.07
NM_001160243	555	662	AMPL10728693	RPAIN	69	1613	776	787	1603	795	808	2259.16
NM_206937	98	198	AMPL21322264	LIG4	50	1702	743	909	1673	754	919	2357.82
NM_002690	1037	1144	AMPL10972961	POLB	52	1799	892	858	1793	913	880	2526.94
NM_000380	210	316	AMPL1942454	XPA	75	1837	896	877	1834	930	904	2584.72
NM_002519	3165	3271	AMPL8729376	NPAT	43	2370	1202	1077	2365	1257	1108	3333.07
NM_005431	147	251	AMPL28183476	XRCC2	40	2419	885	1436	2406	918	1488	3390.86
NM_202001	191	295	AMPL21410533	ERCC1	66	2427	883	1411	2425	979	1446	3417.64
NM_000123	3253	3356	AMPL5292234	ERCC5	47	2450	990	1390	2443	1013	1430	3443
NM_001184	323	429	AMPL6698211	ATR	43	2481	1177	1245	2466	1204	1262	3475.42
NM_057749	886	986	AMPL16718891	CCNE2	36	2604	1412	1116	2596	1456	1140	3658.63
NM_006591	1097	1198	AMPL13673431	POLD3	51	3063	1835	1185	3056	1858	1198	4306.93
NM_002916	379	481	AMPL7035794	RFC4	44	3251	1479	1694	3240	1497	1743	4566.24
NM_013975	1698	1798	AMPL26036433	LIG3	57	3682	1958	1602	3671	2031	1640	5173.66
NM_006297	1116	1223	AMPL27997545	XRCC1	69	3696	1917	1720	3693	1940	1753	5204.67
NM_001789	1202	1304	AMPL7718089	CDC25A	54	3908	1772	1913	3881	1893	1988	5469.62
NM_007300	4881	4985	AMPL13649775	BRCA1	52	4035	1487	2478	4027	1529	2498	5675.39
NM_130398	1057	1162	AMPL16067344	EXO1	43	4801	2263	2338	4794	2401	2393	6756.35
NM_004628	1063	1169	AMPL29984686	XPC	51	4906	2002	2755	4895	2040	2855	6898.69
NM_001761	1114	1220	AMPL9291217	CCNF	68	4987	2439	2401	4977	2494	2483	7014.26
NM_005484	731	838	AMPL29573348	PARP2	44	5074	2616	2369	5060	2666	2394	7131.23
NM_005441	1710	1815	AMPL27852026	CHAF1B	59	5310	2405	2752	5301	2470	2831	7470.88
NM_000400	97	201	AMPL2905825	ERCC2	64	6349	3206	2910	6331	3302	3029	8922.49
NM_001813	4643	4742	AMPL8434722	CENPE	28	6356	3195	2932	6337	3333	3004	8930.95
NM_000489	5267	5369	AMPL3809384	ATRX	38	6811	4195	2463	6794	4277	2517	9575.01
NM_000546	1250	1356	AMPL3223250	TP53	61	7036	3128	3744	7026	3201	3825	9901.98
NM_002875	776	883	AMPL10470661	RAD51	57	7221	3416	3598	7192	3520	3672	10135.9
NM_001100118	299	395	AMPL3903442	XRCC3	44	7666	3567	3870	7657	3696	3961	10791.3
NM_001786	242	344	AMPL7721438	CDK1	40	7706	3440	4015	7693	3572	4121	10842
NM_000234	1789	1896	AMPL1296023	LIG1	60	8384	3825	4240	8370	3950	4420	11796.1
NM_005483	1792	1897	AMPL26958519	CHAF1A	67	8449	3900	1701	8440	4029	4411	11894.8
NM_002497	852	947	AMPL9881690	NEK2	34	9312	4230	4860	9283	4333	4950	13082.8
NM_001012271	182	289	AMPL513992	BIRC5	69	9604	5202	4101	9554	5357	4197	13464.8
NM_001211	2129	2235	AMPL10744784	BUB1B	50	9674	4839	4578	9642	4921	4721	13588.8
NM_005225	895	1004	AMPL29253382	E2F1	59	10570	5335	4671	10420	5500	4920	14685.3
NM_002485	1218	1319	AMPL11472616	NBN	40	10720	5591	4641	10682	5924	4758	15054.5
NM_000943	176	282	AMPL4556695	PPIC	61	10977	4906	5772	10943	4967	5976	15422.3
NM_001255	512	621	AMPL11753453	CDC20	59	11743	6084	5264	11663	6303	5360	16437.1
NM_006904	12226	12332	AMPL13027983	PRKDC	56	11841	5655	5818	11810	5868	5942	16644.2
NM_001826	189	295	AMPL11851612	CKS1B	52	12018	5983	5800	11947	6096	5851	16837.3
NM_000251	1120	1223	AMPL4542401	MSH2	41	12293	5134	6659	12238	5337	6901	17247.4
NM_005180	414	514	AMPL27860015	BMI1	50	13987	4911	6493	12911	6154	6757	18195.9
NM_000179	3312	3416	AMPL4246748	MSH6	55	13326	6897	6219	13295	7015	6280	18737.1
NM_005030	565	673	AMPL27296096	PLK1	51	17477	8780	7713	17341	9174	8167	24439.3
NM_004336	702	803	AMPL29290680	BUB1	37	18571	7903	7687	18499	8053	10446	26071.3
NM_031966	1413	1518	AMPL14157888	CCNB1	45	18614	8087	10014	18573	8274	10299	26175.6
NM_001827	238	339	AMPL8076830	CKS2	40	19052	8106	10406	18959	8232	10727	26719.6
NM_001798	931	1038	AMPL11968322	CDK2	52	20376	8507	11415	20344	8624	11720	28671.5
NM_001641	761	871	AMPL11099164	APEX1	57	21200	8150	12134	21103	8505	12598	29741.2
NM_004701	987	1095	AMPL28634242	CCNB2	48	22512	11164	10926	22469	11294	11175	31666.3
NM_021873	2240	2344	AMPL35114157	CDC25B	58	22608	10792	11170	22576	11144	11432	31817.1
NM_001237	1392	1499	AMPL6726019	CCNA2	51	24292	11661	11655	24194	12297	11897	34097.4
NM_001618	1872	1978	AMPL7740822	PARP1	56	26738	12523	12922	26669	12981	13688	37585.5
NM_182649	720	821	AMPL20801767	PCNA	38	30899	12353	18037	30802	12506	18296	43410.3
NM_001469	583	686	AMPL8648783	XRCC6	58	37454	13885	20020	36058	14259	21799	50817.8
NM_004725	567	669	AMPL27323746	BUB3	48	42258	22965	17825	42154	23470	18684	59409.1
NM_078467	422	530	AMPL18336733	CDKN1A	66	50897	24355	24083	50713	25269	25444	71471.6
NM_021141	1430	1532	AMPL37189013	XRCC5	45	62009	33617	26227	61800	34618	27182	87096.8

## Sheet: A7966-41__S5B-116_X185.amplicon
contig_id	contig_srt	contig_end	region_id	gene_id	gc_count	overlaps	fwd_cov	rev_cov	total_reads	fwd_reads	rev_reads	RPM
NM_152438	344	448	AMPL36465175	DDX11	54	0	0	0	0	0	0	0
NM_003600	1195	1297	AMPL11289894	AURKA	56	26	0	0	26	26	0	42.182
NM_000077	667	772	AMPL4089136	CDKN2A	73	218	69	145	218	70	148	353.684
NM_134424	621	723	AMPL16353693	RAD52	47	256	102	140	253	106	147	410.468
NM_005938	767	876	AMPL29422390	FOXO4	59	314	164	147	314	164	150	509.434
NM_000051	5632	5733	AMPL2143252	ATM	37	325	138	164	316	145	171	512.679
NM_022406	379	478	AMPL35402907	XRCC4	33	773	351	371	764	370	394	1239.52
NM_002519	3165	3271	AMPL8729376	NPAT	43	795	420	307	770	433	337	1249.25
NM_001033855	707	814	AMPL3568418	DCLRE1C	45	869	435	392	867	459	408	1406.62
NM_152463	1596	1704	AMPL34482490	EME1	59	1008	583	396	1008	601	407	1635.38
NM_003884	784	882	AMPL27733081	KAT2B	55	1180	417	734	1175	424	751	1906.32
NM_001238	1005	1106	AMPL7555808	CCNE1	44	1229	633	489	1184	664	520	1920.92
NM_002439	3325	3426	AMPL8534199	MSH3	35	1225	477	722	1221	487	734	1980.95
NM_002690	1037	1144	AMPL10972961	POLB	52	1258	594	638	1256	605	651	2037.74
NM_206937	98	198	AMPL21322264	LIG4	50	1312	610	658	1287	615	672	2088.03
NM_000380	210	316	AMPL1942454	XPA	75	1364	597	718	1361	617	744	2208.09
NM_057749	886	986	AMPL16718891	CCNE2	36	1605	822	736	1593	842	751	2584.49
NM_001160243	555	662	AMPL10728693	RPAIN	69	1647	729	847	1636	758	878	2654.25
NM_000123	3253	3356	AMPL5292234	ERCC5	47	1814	590	1169	1805	606	1199	2928.44
NM_005431	147	251	AMPL28183476	XRCC2	40	2023	664	1308	2015	685	1330	3269.14
NM_001184	323	429	AMPL6698211	ATR	43	2126	997	1091	2119	1021	1098	3437.87
NM_202001	191	295	AMPL21410533	ERCC1	66	2225	881	1197	2217	991	1226	3596.87
NM_006297	1116	1223	AMPL27997545	XRCC1	69	2802	1647	1106	2801	1675	1126	4544.35
NM_013975	1698	1798	AMPL26036433	LIG3	57	2812	1294	1440	2805	1322	1483	4550.84
NM_004628	1063	1169	AMPL29984686	XPC	51	2858	1282	1488	2849	1312	1537	4622.22
NM_006591	1097	1198	AMPL13673431	POLD3	51	2910	1770	1098	2895	1785	1110	4696.85
NM_002916	379	481	AMPL7035794	RFC4	44	3091	1481	1542	3065	1496	1569	4972.66
NM_007300	4881	4985	AMPL13649775	BRCA1	52	3311	1203	2050	3300	1234	2066	5353.93
NM_001789	1202	1304	AMPL7718089	CDC25A	54	3557	1748	1601	3526	1852	1674	5720.59
NM_005484	731	838	AMPL29573348	PARP2	44	3794	2106	1606	3770	2143	1627	6116.46
NM_130398	1057	1162	AMPL16067344	EXO1	43	3822	1643	2061	3813	1713	2100	6186.22
NM_005441	1710	1815	AMPL27852026	CHAF1B	59	3831	1754	1969	3824	1801	2023	6204.07
NM_001813	4643	4742	AMPL8434722	CENPE	28	3845	1588	2141	3829	1634	2195	6212.18
NM_000489	5267	5369	AMPL3809384	ATRX	38	4519	2642	1788	4507	2686	1821	7312.17
NM_001761	1114	1220	AMPL9291217	CCNF	68	5240	2649	2446	5227	2713	2514	8480.3
NM_000546	1250	1356	AMPL3223250	TP53	61	5283	2577	2596	5268	2625	2643	8546.81
NM_000400	97	201	AMPL2905825	ERCC2	64	6160	3060	2897	6138	3136	3002	9958.3
NM_001786	242	344	AMPL7721438	CDK1	40	6306	3168	2963	6289	3255	3034	10203.3
NM_002485	1218	1319	AMPL11472616	NBN	40	6622	3559	2733	6548	3753	2795	10623.5
NM_002875	776	883	AMPL10470661	RAD51	57	6732	3062	3495	6707	3134	3573	10881.5
NM_001100118	299	395	AMPL3903442	XRCC3	44	7122	3645	3313	7103	3719	3384	11523.9
NM_000234	1789	1896	AMPL1296023	LIG1	60	7541	3171	4052	7518	3317	4201	12197.2
NM_006904	12226	12332	AMPL13027983	PRKDC	56	7684	3549	3926	7665	3679	3986	12435.7
NM_002497	852	947	AMPL9881690	NEK2	34	7722	3559	3959	7674	3650	4024	12450.3
NM_005225	895	1004	AMPL29253382	E2F1	59	8254	4413	3422	8112	4531	3581	13160.9
NM_005483	1792	1897	AMPL26958519	CHAF1A	67	8578	4102	2771	8567	4231	4336	13899.1
NM_005180	414	514	AMPL27860015	BMI1	50	9806	3348	4281	8810	4349	4461	14293.4
NM_001211	2129	2235	AMPL10744784	BUB1B	50	8956	4287	4421	8911	4370	4541	14457.2
NM_000943	176	282	AMPL4556695	PPIC	61	9421	3408	5700	9367	3441	5926	15197
NM_000251	1120	1223	AMPL4542401	MSH2	41	9417	4134	4904	9368	4272	5096	15198.7
NM_001012271	182	289	AMPL513992	BIRC5	69	10131	5963	3918	10078	6090	3988	16350.6
NM_001826	189	295	AMPL11851612	CKS1B	52	10867	5491	5148	10803	5613	5190	17526.8
NM_000179	3312	3416	AMPL4246748	MSH6	55	11203	5331	5670	11173	5440	5733	18127.1
NM_001255	512	621	AMPL11753453	CDC20	59	12248	6607	5255	12150	6809	5341	19712.2
NM_005030	565	673	AMPL27296096	PLK1	51	15587	6691	7953	15409	6971	8438	24999.6
NM_001641	761	871	AMPL11099164	APEX1	57	16704	6352	9618	16589	6628	9961	26914
NM_004336	702	803	AMPL29290680	BUB1	37	17137	7140	6830	17079	7289	9790	27709
NM_004701	987	1095	AMPL28634242	CCNB2	48	17938	8306	9309	17887	8389	9498	29019.9
NM_001798	931	1038	AMPL11968322	CDK2	52	18516	7057	11054	18469	7157	11312	29964.1
NM_031966	1413	1518	AMPL14157888	CCNB1	45	18893	9272	9153	18813	9461	9352	30522.3
NM_001827	238	339	AMPL8076830	CKS2	40	18941	8035	10392	18841	8146	10695	30567.7
NM_021873	2240	2344	AMPL35114157	CDC25B	58	19410	9769	9102	19373	10074	9299	31430.8
NM_001618	1872	1978	AMPL7740822	PARP1	56	22987	10437	11500	22931	10796	12135	37203.3
NM_001237	1392	1499	AMPL6726019	CCNA2	51	25851	12395	12619	25760	12900	12860	41793.1
NM_182649	720	821	AMPL20801767	PCNA	38	28767	11435	16816	28642	11551	17091	46468.8
NM_001469	583	686	AMPL8648783	XRCC6	58	31778	11655	17062	30632	11936	18696	49697.4
NM_004725	567	669	AMPL27323746	BUB3	48	41276	23537	16321	41165	24044	17121	66786.2
NM_078467	422	530	AMPL18336733	CDKN1A	66	42968	20290	20657	42784	21022	21762	69412.9
NM_021141	1430	1532	AMPL37189013	XRCC5	45	54346	29597	22845	54131	30493	23638	87822.2

## Sheet: A7966-42__S5B-116_X186.amplicon
contig_id	contig_srt	contig_end	region_id	gene_id	gc_count	overlaps	fwd_cov	rev_cov	total_reads	fwd_reads	rev_reads	RPM
NM_152438	344	448	AMPL36465175	DDX11	54	0	0	0	0	0	0	0
NM_003600	1195	1297	AMPL11289894	AURKA	56	25	0	1	25	22	3	53.9
NM_000051	5632	5733	AMPL2143252	ATM	37	67	21	29	59	21	38	127.204
NM_002519	3165	3271	AMPL8729376	NPAT	43	132	48	34	109	50	59	235.003
NM_022406	379	478	AMPL35402907	XRCC4	33	291	153	86	246	159	87	530.375
NM_134424	621	723	AMPL16353693	RAD52	47	274	110	156	270	111	159	582.119
NM_002439	3325	3426	AMPL8534199	MSH3	35	300	111	181	296	113	183	638.174
NM_002690	1037	1144	AMPL10972961	POLB	52	345	181	142	339	186	153	730.882
NM_000077	667	772	AMPL4089136	CDKN2A	73	345	127	212	343	129	214	739.506
NM_005938	767	876	AMPL29422390	FOXO4	59	535	279	244	528	280	248	1138.37
NM_001238	1005	1106	AMPL7555808	CCNE1	44	684	286	238	602	350	252	1297.91
NM_004628	1063	1169	AMPL29984686	XPC	51	627	298	278	606	305	301	1306.53
NM_000380	210	316	AMPL1942454	XPA	75	693	289	339	669	318	351	1442.36
NM_152463	1596	1704	AMPL34482490	EME1	59	717	412	256	685	422	263	1476.86
NM_000123	3253	3356	AMPL5292234	ERCC5	47	728	320	379	718	326	392	1548
NM_001813	4643	4742	AMPL8434722	CENPE	28	749	298	409	737	306	431	1588.97
NM_005431	147	251	AMPL28183476	XRCC2	40	881	283	477	798	293	505	1720.48
NM_130398	1057	1162	AMPL16067344	EXO1	43	883	324	517	878	352	526	1892.96
NM_202001	191	295	AMPL21410533	ERCC1	66	952	348	507	925	408	517	1994.3
NM_003884	784	882	AMPL27733081	KAT2B	55	983	331	594	958	340	618	2065.44
NM_001033855	707	814	AMPL3568418	DCLRE1C	45	1016	482	486	1006	509	497	2168.93
NM_206937	98	198	AMPL21322264	LIG4	50	1131	449	584	1051	458	593	2265.95
NM_001160243	555	662	AMPL10728693	RPAIN	69	1114	440	611	1093	475	618	2356.5
NM_057749	886	986	AMPL16718891	CCNE2	36	1173	546	553	1147	586	561	2472.93
NM_005441	1710	1815	AMPL27852026	CHAF1B	59	1187	556	595	1179	564	615	2541.92
NM_002916	379	481	AMPL7035794	RFC4	44	1313	578	569	1203	586	617	2593.66
NM_002485	1218	1319	AMPL11472616	NBN	40	1791	826	702	1614	857	757	3479.78
NM_000489	5267	5369	AMPL3809384	ATRX	38	1671	1125	460	1624	1148	476	3501.34
NM_005180	414	514	AMPL27860015	BMI1	50	2258	491	796	1758	923	835	3790.24
NM_001184	323	429	AMPL6698211	ATR	43	1945	735	920	1802	852	950	3885.1
NM_001786	242	344	AMPL7721438	CDK1	40	1893	902	898	1863	942	921	4016.62
NM_006591	1097	1198	AMPL13673431	POLD3	51	2171	1295	791	2133	1316	817	4598.74
NM_002497	852	947	AMPL9881690	NEK2	34	2341	976	1145	2238	1067	1171	4825.12
NM_013975	1698	1798	AMPL26036433	LIG3	57	2267	986	1192	2242	1017	1225	4833.74
NM_001100118	299	395	AMPL3903442	XRCC3	44	2592	1317	1202	2586	1351	1235	5575.4
NM_005484	731	838	AMPL29573348	PARP2	44	2871	1333	1185	2623	1347	1276	5655.17
NM_007300	4881	4985	AMPL13649775	BRCA1	52	2953	1060	1789	2897	1083	1814	6245.92
NM_001789	1202	1304	AMPL7718089	CDC25A	54	3544	1579	1586	3360	1712	1648	7244.14
NM_006297	1116	1223	AMPL27997545	XRCC1	69	3586	1890	1530	3485	1923	1562	7513.64
NM_000546	1250	1356	AMPL3223250	TP53	61	3782	1773	1897	3759	1804	1955	8104.39
NM_000943	176	282	AMPL4556695	PPIC	61	4306	1576	2312	4026	1598	2428	8680.03
NM_000400	97	201	AMPL2905825	ERCC2	64	5669	2915	2462	5570	3030	2540	12008.9
NM_005225	895	1004	AMPL29253382	E2F1	59	5921	2769	2371	5599	2844	2755	12071.4
NM_001255	512	621	AMPL11753453	CDC20	59	6106	2815	2803	5807	2950	2857	12519.9
NM_000234	1789	1896	AMPL1296023	LIG1	60	6148	2269	3431	5900	2348	3552	12720.4
NM_001761	1114	1220	AMPL9291217	CCNF	68	6159	3050	2932	6114	3111	3003	13181.8
NM_005483	1792	1897	AMPL26958519	CHAF1A	67	6935	3179	2350	6854	3300	3554	14777.2
NM_001211	2129	2235	AMPL10744784	BUB1B	50	7562	3153	3599	7200	3210	3990	15523.2
NM_001012271	182	289	AMPL513992	BIRC5	69	7881	4298	3189	7704	4454	3250	16609.8
NM_002875	776	883	AMPL10470661	RAD51	57	8705	4083	4297	8596	4191	4405	18532.9
NM_000179	3312	3416	AMPL4246748	MSH6	55	9400	4775	4419	9348	4869	4479	20154.2
NM_000251	1120	1223	AMPL4542401	MSH2	41	10526	4189	5454	10055	4390	5665	21678.5
NM_006904	12226	12332	AMPL13027983	PRKDC	56	10353	5013	5004	10288	5182	5106	22180.9
NM_001641	761	871	AMPL11099164	APEX1	57	11287	4440	5250	10514	4963	5551	22668.1
NM_001826	189	295	AMPL11851612	CKS1B	52	11968	5004	6369	11612	5147	6465	25035.4
NM_182649	720	821	AMPL20801767	PCNA	38	12402	4774	6750	12009	4833	7176	25891.3
NM_005030	565	673	AMPL27296096	PLK1	51	15310	5924	6394	13988	6552	7436	30158.1
NM_001798	931	1038	AMPL11968322	CDK2	52	14403	6195	7759	14280	6303	7977	30787.6
NM_004336	702	803	AMPL29290680	BUB1	37	14554	5931	7421	14402	6048	8354	31050.6
NM_001827	238	339	AMPL8076830	CKS2	40	16878	7293	8324	16370	7728	8642	35293.6
NM_031966	1413	1518	AMPL14157888	CCNB1	45	18801	8686	9294	18439	8849	9590	39754.4
NM_001618	1872	1978	AMPL7740822	PARP1	56	19682	7940	10628	19383	8244	11139	41789.6
NM_004701	987	1095	AMPL28634242	CCNB2	48	21894	10099	11285	21779	10252	11527	46955.4
NM_078467	422	530	AMPL18336733	CDKN1A	66	22683	9495	11431	22129	10023	12106	47710
NM_021873	2240	2344	AMPL35114157	CDC25B	58	22471	11933	9893	22420	12298	10122	48337.4
NM_001469	583	686	AMPL8648783	XRCC6	58	25150	8772	13042	23686	8987	14699	51066.9
NM_001237	1392	1499	AMPL6726019	CCNA2	51	26454	12224	13029	26137	12809	13328	56351.2
NM_004725	567	669	AMPL27323746	BUB3	48	33859	20200	12387	33651	20671	12980	72551.4
NM_021141	1430	1532	AMPL37189013	XRCC5	45	40078	21430	16594	39509	22103	17406	85181.2

## Sheet: A7966-43__S5B-116_X187.amplicon
contig_id	contig_srt	contig_end	region_id	gene_id	gc_count	overlaps	fwd_cov	rev_cov	total_reads	fwd_reads	rev_reads	RPM
NM_152438	344	448	AMPL36465175	DDX11	54	1	0	0	1	0	1	1.705
NM_003600	1195	1297	AMPL11289894	AURKA	56	48	1	4	48	42	6	81.826
NM_000051	5632	5733	AMPL2143252	ATM	37	79	35	20	67	36	31	114.216
NM_002519	3165	3271	AMPL8729376	NPAT	43	189	57	62	155	57	98	264.231
NM_022406	379	478	AMPL35402907	XRCC4	33	306	143	90	246	151	95	419.359
NM_002439	3325	3426	AMPL8534199	MSH3	35	266	115	142	264	117	147	450.044
NM_134424	621	723	AMPL16353693	RAD52	47	274	119	132	265	127	138	451.749
NM_002690	1037	1144	AMPL10972961	POLB	52	383	151	204	367	154	213	625.63
NM_000077	667	772	AMPL4089136	CDKN2A	73	388	190	175	379	199	180	646.086
NM_005938	767	876	AMPL29422390	FOXO4	59	525	269	228	507	274	233	864.29
NM_004628	1063	1169	AMPL29984686	XPC	51	603	187	350	562	191	371	958.049
NM_000123	3253	3356	AMPL5292234	ERCC5	47	621	207	376	605	210	395	1031.35
NM_001813	4643	4742	AMPL8434722	CENPE	28	673	275	341	655	287	368	1116.59
NM_152463	1596	1704	AMPL34482490	EME1	59	771	402	271	709	420	289	1208.64
NM_005431	147	251	AMPL28183476	XRCC2	40	875	275	397	721	279	442	1229.1
NM_000380	210	316	AMPL1942454	XPA	75	824	332	354	761	392	369	1297.29
NM_202001	191	295	AMPL21410533	ERCC1	66	888	351	442	846	378	468	1442.19
NM_001238	1005	1106	AMPL7555808	CCNE1	44	1127	326	375	860	468	392	1466.05
NM_130398	1057	1162	AMPL16067344	EXO1	43	975	410	508	965	443	522	1645.05
NM_002916	379	481	AMPL7035794	RFC4	44	1311	524	445	1038	536	502	1769.49
NM_001033855	707	814	AMPL3568418	DCLRE1C	45	1089	515	492	1067	557	510	1818.93
NM_001160243	555	662	AMPL10728693	RPAIN	69	1129	444	557	1073	507	566	1829.16
NM_003884	784	882	AMPL27733081	KAT2B	55	1304	493	680	1224	512	712	2086.57
NM_005441	1710	1815	AMPL27852026	CHAF1B	59	1337	549	687	1284	561	723	2188.85
NM_206937	98	198	AMPL21322264	LIG4	50	1450	635	632	1296	652	644	2209.31
NM_000489	5267	5369	AMPL3809384	ATRX	38	1617	828	653	1533	864	669	2613.32
NM_057749	886	986	AMPL16718891	CCNE2	36	1641	752	723	1548	818	730	2638.9
NM_001184	323	429	AMPL6698211	ATR	43	1840	656	619	1570	899	671	2676.4
NM_005180	414	514	AMPL27860015	BMI1	50	2327	489	700	1774	1049	725	3024.16
NM_002485	1218	1319	AMPL11472616	NBN	40	2056	749	901	1787	796	991	3046.32
NM_006591	1097	1198	AMPL13673431	POLD3	51	1954	1031	768	1864	1047	817	3177.59
NM_001786	242	344	AMPL7721438	CDK1	40	2201	1030	1037	2154	1089	1065	3671.95
NM_002497	852	947	AMPL9881690	NEK2	34	2709	991	1281	2466	1161	1305	4203.82
NM_001100118	299	395	AMPL3903442	XRCC3	44	2523	1223	1204	2508	1265	1243	4275.42
NM_005484	731	838	AMPL29573348	PARP2	44	3122	1105	1252	2627	1123	1504	4478.28
NM_013975	1698	1798	AMPL26036433	LIG3	57	3014	1435	1414	2947	1483	1464	5023.79
NM_000546	1250	1356	AMPL3223250	TP53	61	3124	1348	1589	3057	1391	1666	5211.31
NM_007300	4881	4985	AMPL13649775	BRCA1	52	3360	1345	1737	3175	1409	1766	5412.46
NM_000943	176	282	AMPL4556695	PPIC	61	3836	1632	1403	3360	1663	1697	5727.84
NM_006297	1116	1223	AMPL27997545	XRCC1	69	4702	2301	2005	4390	2334	2056	7483.69
NM_001789	1202	1304	AMPL7718089	CDC25A	54	5295	2009	2393	4735	2245	2490	8071.82
NM_005483	1792	1897	AMPL26958519	CHAF1A	67	5743	2640	2016	5559	2753	2806	9476.5
NM_000234	1789	1896	AMPL1296023	LIG1	60	6289	2366	3292	5924	2440	3484	10098.7
NM_005225	895	1004	AMPL29253382	E2F1	59	6895	2517	2749	6164	2651	3513	10507.9
NM_001255	512	621	AMPL11753453	CDC20	59	8169	3752	3115	7348	4123	3225	12526.2
NM_001761	1114	1220	AMPL9291217	CCNF	68	7743	3894	3442	7567	4016	3551	12899.6
NM_000400	97	201	AMPL2905825	ERCC2	64	8284	3858	3600	7967	4137	3830	13581.4
NM_001211	2129	2235	AMPL10744784	BUB1B	50	8854	3387	3529	7973	3465	4508	13591.7
NM_001012271	182	289	AMPL513992	BIRC5	69	10762	5455	3974	10110	6014	4096	17234.6
NM_000251	1120	1223	AMPL4542401	MSH2	41	12511	4127	6371	11252	4438	6814	19181.4
NM_002875	776	883	AMPL10470661	RAD51	57	12388	5718	5817	11910	5928	5982	20303.1
NM_000179	3312	3416	AMPL4246748	MSH6	55	12375	5549	6472	12229	5669	6560	20846.9
NM_006904	12226	12332	AMPL13027983	PRKDC	56	13795	7057	6129	13626	7350	6276	23228.4
NM_182649	720	821	AMPL20801767	PCNA	38	15318	5307	7742	14361	5401	8960	24481.4
NM_001826	189	295	AMPL11851612	CKS1B	52	16174	7185	7401	15131	7502	7629	25794
NM_001641	761	871	AMPL11099164	APEX1	57	17241	5235	8459	15347	6367	8980	26162.2
NM_004336	702	803	AMPL29290680	BUB1	37	16776	7403	7379	16408	7646	8762	27970.9
NM_001827	238	339	AMPL8076830	CKS2	40	17903	6571	8265	16554	7855	8699	28219.8
NM_001798	931	1038	AMPL11968322	CDK2	52	17374	6508	9955	17084	6716	10368	29123.3
NM_001618	1872	1978	AMPL7740822	PARP1	56	25252	10893	11927	24072	11361	12711	41035.9
NM_005030	565	673	AMPL27296096	PLK1	51	27734	10552	9306	24199	12487	11712	41252.3
NM_078467	422	530	AMPL18336733	CDKN1A	66	27141	12372	11498	25698	13354	12344	43807.7
NM_031966	1413	1518	AMPL14157888	CCNB1	45	28172	12777	13052	26630	13094	13536	45396.5
NM_021873	2240	2344	AMPL35114157	CDC25B	58	30635	14721	14925	30482	15213	15269	51963.1
NM_001237	1392	1499	AMPL6726019	CCNA2	51	31928	13167	16836	31124	13803	17321	53057.5
NM_004701	987	1095	AMPL28634242	CCNB2	48	36072	17843	16717	35532	18061	17471	60571.9
NM_001469	583	686	AMPL8648783	XRCC6	58	44122	16084	20973	40923	16521	24402	69762
NM_004725	567	669	AMPL27323746	BUB3	48	41739	21643	17957	41183	22311	18872	70205.2
NM_021141	1430	1532	AMPL37189013	XRCC5	45	48097	24248	20047	46792	25147	21645	79766.9

## Sheet: A7966-44__S5B-116_X188.amplicon
contig_id	contig_srt	contig_end	region_id	gene_id	gc_count	overlaps	fwd_cov	rev_cov	total_reads	fwd_reads	rev_reads	RPM
NM_152438	344	448	AMPL36465175	DDX11	54	1	0	0	1	0	1	1.731
NM_003600	1195	1297	AMPL11289894	AURKA	56	37	0	0	34	34	0	58.86
NM_000051	5632	5733	AMPL2143252	ATM	37	83	22	28	69	24	45	119.451
NM_002519	3165	3271	AMPL8729376	NPAT	43	156	62	32	130	65	65	225.052
NM_002439	3325	3426	AMPL8534199	MSH3	35	184	81	86	179	84	95	309.879
NM_022406	379	478	AMPL35402907	XRCC4	33	281	152	54	227	168	59	392.976
NM_000123	3253	3356	AMPL5292234	ERCC5	47	323	91	189	299	95	204	517.62
NM_002690	1037	1144	AMPL10972961	POLB	52	325	150	148	315	161	154	545.319
NM_000077	667	772	AMPL4089136	CDKN2A	73	373	104	224	338	108	230	585.135
NM_134424	621	723	AMPL16353693	RAD52	47	391	177	168	360	183	177	623.221
NM_001813	4643	4742	AMPL8434722	CENPE	28	428	167	218	416	181	235	720.167
NM_005938	767	876	AMPL29422390	FOXO4	59	463	212	220	445	221	224	770.371
NM_000380	210	316	AMPL1942454	XPA	75	528	176	219	485	253	232	839.617
NM_004628	1063	1169	AMPL29984686	XPC	51	535	264	201	488	279	209	844.811
NM_005431	147	251	AMPL28183476	XRCC2	40	827	256	339	657	258	399	1137.38
NM_152463	1596	1704	AMPL34482490	EME1	59	723	344	194	658	414	244	1139.11
NM_130398	1057	1162	AMPL16067344	EXO1	43	758	372	337	737	389	348	1275.87
NM_001160243	555	662	AMPL10728693	RPAIN	69	846	317	332	770	422	348	1333
NM_000489	5267	5369	AMPL3809384	ATRX	38	908	632	123	791	659	132	1369.36
NM_202001	191	295	AMPL21410533	ERCC1	66	889	391	390	848	435	413	1468.03
NM_005441	1710	1815	AMPL27852026	CHAF1B	59	964	453	433	925	463	462	1601.33
NM_001238	1005	1106	AMPL7555808	CCNE1	44	1354	307	368	930	541	389	1609.99
NM_002916	379	481	AMPL7035794	RFC4	44	1438	531	469	1112	544	568	1925.06
NM_206937	98	198	AMPL21322264	LIG4	50	1453	491	647	1186	513	673	2053.17
NM_005180	414	514	AMPL27860015	BMI1	50	1704	323	394	1220	801	419	2112.03
NM_001033855	707	814	AMPL3568418	DCLRE1C	45	1380	564	647	1310	642	668	2267.83
NM_002497	852	947	AMPL9881690	NEK2	34	1539	559	571	1356	780	576	2347.47
NM_001100118	299	395	AMPL3903442	XRCC3	44	1385	450	833	1370	512	858	2371.7
NM_006591	1097	1198	AMPL13673431	POLD3	51	1507	732	568	1382	751	631	2392.48
NM_003884	784	882	AMPL27733081	KAT2B	55	1585	478	888	1430	502	928	2475.57
NM_002485	1218	1319	AMPL11472616	NBN	40	1837	699	704	1565	752	813	2709.28
NM_001184	323	429	AMPL6698211	ATR	43	2065	581	578	1647	968	679	2851.24
NM_057749	886	986	AMPL16718891	CCNE2	36	1824	683	842	1676	816	860	2901.44
NM_005484	731	838	AMPL29573348	PARP2	44	2319	683	837	1826	694	1132	3161.12
NM_007300	4881	4985	AMPL13649775	BRCA1	52	2213	790	1138	2007	843	1164	3474.46
NM_013975	1698	1798	AMPL26036433	LIG3	57	2100	905	1049	2031	944	1087	3516.01
NM_001786	242	344	AMPL7721438	CDK1	40	2181	1043	1002	2134	1100	1034	3694.32
NM_000943	176	282	AMPL4556695	PPIC	61	2625	856	822	2159	868	1291	3737.6
NM_000546	1250	1356	AMPL3223250	TP53	61	2728	1259	1180	2608	1291	1317	4514.89
NM_006297	1116	1223	AMPL27997545	XRCC1	69	3900	1509	1858	3451	1532	1919	5974.27
NM_001255	512	621	AMPL11753453	CDC20	59	5593	2367	1609	4549	2841	1708	7875.09
NM_001211	2129	2235	AMPL10744784	BUB1B	50	5502	1987	1821	4628	2095	2533	8011.85
NM_005225	895	1004	AMPL29253382	E2F1	59	6103	2247	1918	5325	2425	2900	9218.48
NM_005483	1792	1897	AMPL26958519	CHAF1A	67	5736	2430	1818	5496	2579	2917	9514.51
NM_000234	1789	1896	AMPL1296023	LIG1	60	6065	2385	2999	5695	2491	3204	9859.01
NM_001789	1202	1304	AMPL7718089	CDC25A	54	7150	2246	3059	5790	2593	3197	10023.5
NM_001761	1114	1220	AMPL9291217	CCNF	68	6186	2606	3050	5881	2711	3170	10181
NM_000179	3312	3416	AMPL4246748	MSH6	55	8612	4263	3883	8356	4402	3954	14465.7
NM_000400	97	201	AMPL2905825	ERCC2	64	9254	3868	3742	8533	4359	4174	14772.1
NM_004336	702	803	AMPL29290680	BUB1	37	9208	4183	3952	8811	4350	4461	15253.3
NM_001012271	182	289	AMPL513992	BIRC5	69	11224	5148	3513	10070	6451	3619	17432.9
NM_000251	1120	1223	AMPL4542401	MSH2	41	12346	3601	5883	10608	4117	6491	18364.3
NM_002875	776	883	AMPL10470661	RAD51	57	12987	5933	5036	11969	6288	5681	20720.4
NM_005030	565	673	AMPL27296096	PLK1	51	18025	4931	4193	13291	6976	6315	23009
NM_001641	761	871	AMPL11099164	APEX1	57	17525	5750	4970	13458	7517	5941	23298.1
NM_001827	238	339	AMPL8076830	CKS2	40	15577	5322	5987	13528	6949	6579	23419.3
NM_001826	189	295	AMPL11851612	CKS1B	52	15880	5826	6978	13552	6193	7359	23460.8
NM_001798	931	1038	AMPL11968322	CDK2	52	15487	7175	6915	14909	7572	7337	25810
NM_182649	720	821	AMPL20801767	PCNA	38	17244	5937	6595	15062	6078	8984	26074.9
NM_006904	12226	12332	AMPL13027983	PRKDC	56	18727	8908	8560	18244	9379	8865	31583.5
NM_031966	1413	1518	AMPL14157888	CCNB1	45	20402	8298	9042	18246	8552	9694	31586.9
NM_021873	2240	2344	AMPL35114157	CDC25B	58	21232	10151	10181	21040	10573	10467	36423.8
NM_001618	1872	1978	AMPL7740822	PARP1	56	23832	8104	12087	21812	8713	13099	37760.3
NM_001237	1392	1499	AMPL6726019	CCNA2	51	24054	11586	10463	23096	12167	10929	39983.1
NM_004701	987	1095	AMPL28634242	CCNB2	48	25032	11008	12194	24300	11185	13115	42067.4
NM_004725	567	669	AMPL27323746	BUB3	48	41721	23223	15127	40690	24331	16359	70441.3
NM_021141	1430	1532	AMPL37189013	XRCC5	45	48579	23769	18162	45705	25094	20611	79123.1
NM_001469	583	686	AMPL8648783	XRCC6	58	62050	17187	29357	55097	17983	37114	95382.3
NM_078467	422	530	AMPL18336733	CDKN1A	66	93187	45018	35322	88331	49545	38786	152916

## Sheet: A7966-45__S5B-116_X189.amplicon
contig_id	contig_srt	contig_end	region_id	gene_id	gc_count	overlaps	fwd_cov	rev_cov	total_reads	fwd_reads	rev_reads	RPM
NM_152438	344	448	AMPL36465175	DDX11	54	0	0	0	0	0	0	0
NM_000051	5632	5733	AMPL2143252	ATM	37	38	7	15	29	7	22	77.178
NM_003600	1195	1297	AMPL11289894	AURKA	56	37	0	3	32	29	3	85.162
NM_002519	3165	3271	AMPL8729376	NPAT	43	97	22	32	79	22	57	210.244
NM_022406	379	478	AMPL35402907	XRCC4	33	201	110	41	158	113	45	420.488
NM_002439	3325	3426	AMPL8534199	MSH3	35	199	88	95	192	92	100	510.973
NM_134424	621	723	AMPL16353693	RAD52	47	231	103	112	223	105	118	593.473
NM_005938	767	876	AMPL29422390	FOXO4	59	255	125	115	245	127	118	652.022
NM_002690	1037	1144	AMPL10972961	POLB	52	284	118	142	276	125	151	734.523
NM_000077	667	772	AMPL4089136	CDKN2A	73	295	113	154	282	121	161	750.491
NM_001813	4643	4742	AMPL8434722	CENPE	28	338	149	151	326	158	168	867.589
NM_000123	3253	3356	AMPL5292234	ERCC5	47	348	126	189	332	128	204	883.557
NM_152463	1596	1704	AMPL34482490	EME1	59	417	205	113	367	237	130	976.703
NM_005431	147	251	AMPL28183476	XRCC2	40	536	152	244	432	157	275	1149.69
NM_130398	1057	1162	AMPL16067344	EXO1	43	526	182	305	520	201	319	1383.88
NM_000380	210	316	AMPL1942454	XPA	75	596	234	226	544	295	249	1447.76
NM_004628	1063	1169	AMPL29984686	XPC	51	610	330	213	573	343	230	1524.93
NM_002916	379	481	AMPL7035794	RFC4	44	802	311	244	625	320	305	1663.32
NM_001160243	555	662	AMPL10728693	RPAIN	69	687	261	296	627	319	308	1668.64
NM_202001	191	295	AMPL21410533	ERCC1	66	712	254	380	680	284	396	1809.69
NM_206937	98	198	AMPL21322264	LIG4	50	860	326	362	707	336	371	1881.55
NM_005441	1710	1815	AMPL27852026	CHAF1B	59	737	286	397	721	292	429	1918.81
NM_001033855	707	814	AMPL3568418	DCLRE1C	45	763	309	382	726	331	395	1932.12
NM_001238	1005	1106	AMPL7555808	CCNE1	44	1091	290	335	811	462	349	2158.33
NM_057749	886	986	AMPL16718891	CCNE2	36	927	356	420	837	406	431	2227.52
NM_000489	5267	5369	AMPL3809384	ATRX	38	930	464	367	846	473	373	2251.47
NM_001786	242	344	AMPL7721438	CDK1	40	877	386	412	851	427	424	2264.78
NM_003884	784	882	AMPL27733081	KAT2B	55	1089	406	531	983	425	558	2616.07
NM_005180	414	514	AMPL27860015	BMI1	50	1392	269	403	1012	584	428	2693.25
NM_002497	852	947	AMPL9881690	NEK2	34	1169	420	435	1015	572	443	2701.24
NM_002485	1218	1319	AMPL11472616	NBN	40	1198	437	494	1019	468	551	2711.88
NM_001184	323	429	AMPL6698211	ATR	43	1309	339	463	1036	524	512	2757.12
NM_006591	1097	1198	AMPL13673431	POLD3	51	1151	604	393	1053	623	430	2802.36
NM_013975	1698	1798	AMPL26036433	LIG3	57	1417	725	606	1384	753	631	3683.26
NM_005484	731	838	AMPL29573348	PARP2	44	1797	591	620	1455	602	853	3872.21
NM_001100118	299	395	AMPL3903442	XRCC3	44	1518	736	717	1504	764	740	4002.62
NM_007300	4881	4985	AMPL13649775	BRCA1	52	1655	639	819	1504	672	832	4002.62
NM_000546	1250	1356	AMPL3223250	TP53	61	2145	957	963	2059	981	1078	5479.65
NM_000943	176	282	AMPL4556695	PPIC	61	2809	806	1049	2397	828	1569	6379.17
NM_006297	1116	1223	AMPL27997545	XRCC1	69	3344	1645	1316	3022	1672	1350	8042.5
NM_001211	2129	2235	AMPL10744784	BUB1B	50	3559	1058	1370	3067	1111	1956	8162.26
NM_001789	1202	1304	AMPL7718089	CDC25A	54	4187	1462	1781	3560	1677	1883	9474.28
NM_001255	512	621	AMPL11753453	CDC20	59	4364	1834	1372	3562	2148	1414	9479.61
NM_001761	1114	1220	AMPL9291217	CCNF	68	3828	1569	1986	3673	1624	2049	9775.01
NM_005225	895	1004	AMPL29253382	E2F1	59	4392	1461	1521	3752	1582	2170	9985.26
NM_005483	1792	1897	AMPL26958519	CHAF1A	67	4799	1858	1501	4574	1938	2636	12172.9
NM_000400	97	201	AMPL2905825	ERCC2	64	5094	2436	1785	4710	2714	1996	12534.8
NM_000234	1789	1896	AMPL1296023	LIG1	60	5376	1897	2977	5117	1963	3154	13618
NM_000179	3312	3416	AMPL4246748	MSH6	55	6216	2872	3036	6075	2982	3093	16167.5
NM_001012271	182	289	AMPL513992	BIRC5	69	7677	3632	2274	6782	4447	2335	18049
NM_000251	1120	1223	AMPL4542401	MSH2	41	8484	2271	4179	7155	2572	4583	19041.7
NM_002875	776	883	AMPL10470661	RAD51	57	7968	3600	3459	7404	3806	3598	19704.4
NM_004336	702	803	AMPL29290680	BUB1	37	8184	3065	4194	7841	3202	4639	20867.4
NM_005030	565	673	AMPL27296096	PLK1	51	10370	2640	2542	7902	3819	4083	21029.7
NM_001641	761	871	AMPL11099164	APEX1	57	10587	2902	4050	8340	3835	4505	22195.4
NM_006904	12226	12332	AMPL13027983	PRKDC	56	8602	4192	3878	8389	4379	4010	22325.8
NM_001798	931	1038	AMPL11968322	CDK2	52	9593	3858	4870	9298	4088	5210	24744.9
NM_001827	238	339	AMPL8076830	CKS2	40	11211	3613	4574	9738	4767	4971	25915.9
NM_001826	189	295	AMPL11851612	CKS1B	52	11467	3941	5390	9894	4185	5709	26331.1
NM_182649	720	821	AMPL20801767	PCNA	38	11707	4426	4502	10254	4507	5747	27289.1
NM_001237	1392	1499	AMPL6726019	CCNA2	51	12443	5811	5304	11673	6142	5531	31065.5
NM_031966	1413	1518	AMPL14157888	CCNB1	45	14490	5972	6850	13261	6159	7102	35291.7
NM_021873	2240	2344	AMPL35114157	CDC25B	58	16054	8630	6823	15922	8926	6996	42373.5
NM_004701	987	1095	AMPL28634242	CCNB2	48	17396	7609	8538	16836	7698	9138	44805.9
NM_001618	1872	1978	AMPL7740822	PARP1	56	20694	8410	9300	19050	8903	10147	50698.1
NM_004725	567	669	AMPL27323746	BUB3	48	23994	12091	10137	23396	12605	10791	62264.1
NM_021141	1430	1532	AMPL37189013	XRCC5	45	30715	15188	11295	28849	15966	12883	76776.3
NM_001469	583	686	AMPL8648783	XRCC6	58	39962	13577	17487	35621	14077	21544	94798.7
NM_078467	422	530	AMPL18336733	CDKN1A	66	51788	20126	24005	48575	22489	26086	129273

## Sheet: A7966-46__S5B-116_X190.amplicon
contig_id	contig_srt	contig_end	region_id	gene_id	gc_count	overlaps	fwd_cov	rev_cov	total_reads	fwd_reads	rev_reads	RPM
NM_152438	344	448	AMPL36465175	DDX11	54	0	0	0	0	0	0	0.000
NM_003600	1195	1297	AMPL11289894	AURKA	56	40	0	2	38	35	3	59.478
NM_000051	5632	5733	AMPL2143252	ATM	37	102	40	29	86	40	46	134.609
NM_002519	3165	3271	AMPL8729376	NPAT	43	203	71	60	173	73	100	270.783
NM_000077	667	772	AMPL4089136	CDKN2A	73	322	170	139	317	176	141	496.175
NM_002439	3325	3426	AMPL8534199	MSH3	35	357	162	184	354	164	190	554.089
NM_022406	379	478	AMPL35402907	XRCC4	33	455	214	145	373	223	150	583.828
NM_134424	621	723	AMPL16353693	RAD52	47	529	254	264	526	258	268	823.307
NM_005938	767	876	AMPL29422390	FOXO4	59	537	277	239	529	284	245	828.002
NM_002690	1037	1144	AMPL10972961	POLB	52	604	293	280	583	297	286	912.524
NM_152463	1596	1704	AMPL34482490	EME1	59	820	454	275	761	472	289	1191.13
NM_000123	3253	3356	AMPL5292234	ERCC5	47	864	355	483	854	359	495	1336.7
NM_004628	1063	1169	AMPL29984686	XPC	51	981	378	524	935	389	546	1463.48
NM_001813	4643	4742	AMPL8434722	CENPE	28	1078	378	618	1062	397	665	1662.27
NM_001238	1005	1106	AMPL7555808	CCNE1	44	1229	523	416	1070	633	437	1674.79
NM_005431	147	251	AMPL28183476	XRCC2	40	1261	405	634	1103	412	691	1726.44
NM_000380	210	316	AMPL1942454	XPA	75	1174	526	523	1122	587	535	1756.18
NM_202001	191	295	AMPL21410533	ERCC1	66	1244	384	741	1217	452	765	1904.88
NM_001033855	707	814	AMPL3568418	DCLRE1C	45	1282	576	624	1260	619	641	1972.18
NM_130398	1057	1162	AMPL16067344	EXO1	43	1295	594	635	1277	621	656	1998.79
NM_206937	98	198	AMPL21322264	LIG4	50	1444	526	776	1324	540	784	2072.35
NM_002916	379	481	AMPL7035794	RFC4	44	1544	666	646	1372	682	690	2147.49
NM_003884	784	882	AMPL27733081	KAT2B	55	1648	569	962	1593	580	1013	2493.4
NM_001160243	555	662	AMPL10728693	RPAIN	69	1659	758	791	1626	817	809	2545.05
NM_057749	886	986	AMPL16718891	CCNE2	36	1866	876	858	1789	921	868	2800.18
NM_005441	1710	1815	AMPL27852026	CHAF1B	59	1889	841	955	1850	857	993	2895.66
NM_001786	242	344	AMPL7721438	CDK1	40	2121	996	1013	2085	1037	1048	3263.49
NM_002485	1218	1319	AMPL11472616	NBN	40	2492	934	1108	2194	987	1207	3434.1
NM_001184	323	429	AMPL6698211	ATR	43	2450	997	1056	2280	1179	1101	3568.71
NM_006591	1097	1198	AMPL13673431	POLD3	51	2422	1293	989	2340	1312	1028	3662.62
NM_005180	414	514	AMPL27860015	BMI1	50	2996	771	1000	2383	1333	1050	3729.92
NM_000489	5267	5369	AMPL3809384	ATRX	38	2484	1303	1047	2407	1340	1067	3767.49
NM_013975	1698	1798	AMPL26036433	LIG3	57	3214	1618	1468	3173	1663	1510	4966.45
NM_002497	852	947	AMPL9881690	NEK2	34	3768	1668	1693	3593	1863	1730	5623.84
NM_005484	731	838	AMPL29573348	PARP2	44	4161	1630	1929	3769	1655	2114	5899.32
NM_001100118	299	395	AMPL3903442	XRCC3	44	4116	1964	2036	4106	2026	2080	6426.8
NM_000943	176	282	AMPL4556695	PPIC	61	4585	1722	2246	4182	1743	2439	6545.76
NM_000546	1250	1356	AMPL3223250	TP53	61	4728	2030	2518	4689	2084	2605	7339.33
NM_001789	1202	1304	AMPL7718089	CDC25A	54	4992	2080	2320	4707	2270	2437	7367.5
NM_007300	4881	4985	AMPL13649775	BRCA1	52	4999	1913	2859	4885	1988	2897	7646.11
NM_006297	1116	1223	AMPL27997545	XRCC1	69	5217	2576	2424	5079	2615	2464	7949.76
NM_001761	1114	1220	AMPL9291217	CCNF	68	7011	3424	3308	6914	3521	3393	10821.9
NM_000400	97	201	AMPL2905825	ERCC2	64	7587	3963	3179	7458	4136	3322	11673.4
NM_001211	2129	2235	AMPL10744784	BUB1B	50	8384	3589	3522	7764	3680	4084	12152.4
NM_005225	895	1004	AMPL29253382	E2F1	59	9112	3960	3812	8585	4097	4488	13437.4
NM_001255	512	621	AMPL11753453	CDC20	59	9145	4214	4106	8656	4434	4222	13548.6
NM_000234	1789	1896	AMPL1296023	LIG1	60	9009	3930	4405	8663	4089	4574	13559.5
NM_005483	1792	1897	AMPL26958519	CHAF1A	67	9079	4358	2949	8965	4528	4437	14032.2
NM_001012271	182	289	AMPL513992	BIRC5	69	11732	6328	4690	11432	6643	4789	17893.6
NM_002875	776	883	AMPL10470661	RAD51	57	11898	5771	5649	11721	5936	5785	18346
NM_000251	1120	1223	AMPL4542401	MSH2	41	13926	5148	7331	13042	5405	7637	20413.6
NM_001826	189	295	AMPL11851612	CKS1B	52	13982	6090	6876	13295	6279	7016	20809.6
NM_000179	3312	3416	AMPL4246748	MSH6	55	13615	6821	6507	13548	6971	6577	21205.6
NM_182649	720	821	AMPL20801767	PCNA	38	17214	6895	8976	16631	6994	9637	26031.2
NM_006904	12226	12332	AMPL13027983	PRKDC	56	17199	7853	8761	17076	8137	8939	26727.7
NM_005030	565	673	AMPL27296096	PLK1	51	20870	7960	7563	18549	9067	9482	29033.3
NM_001641	761	871	AMPL11099164	APEX1	57	20162	6989	10521	18880	7819	11061	29551.4
NM_001798	931	1038	AMPL11968322	CDK2	52	19595	8950	9850	19387	9175	10212	30345
NM_004336	702	803	AMPL29290680	BUB1	37	21068	9074	9623	20798	9298	11500	32553.5
NM_001827	238	339	AMPL8076830	CKS2	40	24783	11153	11456	23896	12005	11891	37402.5
NM_078467	422	530	AMPL18336733	CDKN1A	66	25844	12326	11176	24963	13136	11827	39072.6
NM_031966	1413	1518	AMPL14157888	CCNB1	45	26811	12879	12785	26333	13149	13184	41217
NM_001237	1392	1499	AMPL6726019	CCNA2	51	28132	12997	13450	27550	13697	13853	43121.9
NM_001618	1872	1978	AMPL7740822	PARP1	56	30882	13293	15391	30154	13856	16298	47197.7
NM_021873	2240	2344	AMPL35114157	CDC25B	58	31568	16078	14564	31446	16568	14878	49220
NM_004701	987	1095	AMPL28634242	CCNB2	48	35824	18108	16735	35544	18331	17213	55634.3
NM_004725	567	669	AMPL27323746	BUB3	48	41063	21445	17823	40748	21952	18796	63779.7
NM_001469	583	686	AMPL8648783	XRCC6	58	43428	14768	23222	41000	15150	25850	64174.1
NM_021141	1430	1532	AMPL37189013	XRCC5	45	51738	27487	21128	50823	28325	22498	79549.3

## Sheet: A7966-47__S5B-116_X191.amplicon
contig_id	contig_srt	contig_end	region_id	gene_id	gc_count	overlaps	fwd_cov	rev_cov	total_reads	fwd_reads	rev_reads	RPM
NM_152438	344	448	AMPL36465175	DDX11	54	2	0	0	2	0	2	2.36
NM_003600	1195	1297	AMPL11289894	AURKA	56	43	2	2	43	40	3	50.74
NM_005938	767	876	AMPL29422390	FOXO4	59	304	166	135	304	166	138	358.722
NM_000077	667	772	AMPL4089136	CDKN2A	73	342	151	186	341	151	190	402.382
NM_000051	5632	5733	AMPL2143252	ATM	37	421	158	207	398	163	235	469.642
NM_134424	621	723	AMPL16353693	RAD52	47	573	294	270	571	297	274	673.783
NM_002519	3165	3271	AMPL8729376	NPAT	43	951	438	400	900	448	452	1062.01
NM_022406	379	478	AMPL35402907	XRCC4	33	1083	517	483	1042	539	503	1229.57
NM_001033855	707	814	AMPL3568418	DCLRE1C	45	1068	504	501	1059	543	516	1249.62
NM_152463	1596	1704	AMPL34482490	EME1	59	1175	634	504	1170	654	516	1380.61
NM_001238	1005	1106	AMPL7555808	CCNE1	44	1646	775	693	1565	832	733	1846.71
NM_002439	3325	3426	AMPL8534199	MSH3	35	1638	780	815	1634	800	834	1928.13
NM_002690	1037	1144	AMPL10972961	POLB	52	1660	891	707	1649	922	727	1945.83
NM_206937	98	198	AMPL21322264	LIG4	50	1724	801	861	1678	807	871	1980.05
NM_000380	210	316	AMPL1942454	XPA	75	1976	913	987	1969	947	1022	2323.43
NM_001160243	555	662	AMPL10728693	RPAIN	69	2200	1011	1119	2184	1040	1144	2577.13
NM_057749	886	986	AMPL16718891	CCNE2	36	2444	1107	1263	2437	1151	1286	2875.67
NM_003884	784	882	AMPL27733081	KAT2B	55	2687	1196	1406	2678	1223	1455	3160.05
NM_202001	191	295	AMPL21410533	ERCC1	66	2796	1009	1617	2779	1132	1647	3279.23
NM_005431	147	251	AMPL28183476	XRCC2	40	2972	1143	1699	2918	1172	1746	3443.26
NM_006591	1097	1198	AMPL13673431	POLD3	51	3295	1734	1491	3273	1759	1514	3862.16
NM_001184	323	429	AMPL6698211	ATR	43	3471	1618	1737	3449	1676	1773	4069.84
NM_004628	1063	1169	AMPL29984686	XPC	51	3570	1364	2074	3554	1399	2155	4193.74
NM_001786	242	344	AMPL7721438	CDK1	40	3604	521	2952	3578	548	3030	4222.06
NM_000123	3253	3356	AMPL5292234	ERCC5	47	3612	1391	2101	3599	1431	2168	4246.84
NM_002916	379	481	AMPL7035794	RFC4	44	3736	1786	1839	3699	1811	1888	4364.84
NM_013975	1698	1798	AMPL26036433	LIG3	57	4025	2209	1671	4017	2275	1742	4740.08
NM_001789	1202	1304	AMPL7718089	CDC25A	54	4065	1823	2026	4041	1937	2104	4768.4
NM_006297	1116	1223	AMPL27997545	XRCC1	69	4849	2445	2305	4836	2484	2352	5706.5
NM_130398	1057	1162	AMPL16067344	EXO1	43	4867	2300	2332	4853	2469	2384	5726.56
NM_005441	1710	1815	AMPL27852026	CHAF1B	59	4995	2195	2651	4973	2256	2717	5868.16
NM_007300	4881	4985	AMPL13649775	BRCA1	52	5076	2094	2848	5054	2172	2882	5963.75
NM_001813	4643	4742	AMPL8434722	CENPE	28	5567	2500	2829	5540	2637	2903	6537.23
NM_001761	1114	1220	AMPL9291217	CCNF	68	6326	2889	3263	6309	2957	3352	7444.65
NM_000489	5267	5369	AMPL3809384	ATRX	38	6578	3715	2662	6542	3834	2708	7719.59
NM_005484	731	838	AMPL29573348	PARP2	44	6705	3387	3100	6622	3472	3150	7813.99
NM_000400	97	201	AMPL2905825	ERCC2	64	7566	4169	3101	7541	4306	3235	8898.42
NM_002875	776	883	AMPL10470661	RAD51	57	8478	4265	3938	8439	4418	4021	9958.06
NM_002485	1218	1319	AMPL11472616	NBN	40	8675	3966	4087	8458	4224	4234	9980.48
NM_001100118	299	395	AMPL3903442	XRCC3	44	8551	3932	4280	8529	4121	4408	10064.3
NM_000546	1250	1356	AMPL3223250	TP53	61	8906	4561	4129	8891	4654	4237	10491.4
NM_005225	895	1004	AMPL29253382	E2F1	59	10416	5102	4667	10231	5287	4944	12072.6
NM_002497	852	947	AMPL9881690	NEK2	34	10466	4456	5666	10370	4601	5769	12236.7
NM_005483	1792	1897	AMPL26958519	CHAF1A	67	11153	4946	4026	11127	5128	5999	13129.9
NM_000234	1789	1896	AMPL1296023	LIG1	60	11260	4715	5579	11193	4903	6290	13207.8
NM_005180	414	514	AMPL27860015	BMI1	50	13909	5269	5805	12778	6735	6043	15078.1
NM_001211	2129	2235	AMPL10744784	BUB1B	50	13147	6168	6523	13038	6288	6750	15384.9
NM_000943	176	282	AMPL4556695	PPIC	61	13297	6194	6541	13122	6276	6846	15484
NM_006904	12226	12332	AMPL13027983	PRKDC	56	13472	6069	6941	13435	6325	7110	15853.4
NM_000251	1120	1223	AMPL4542401	MSH2	41	14001	5951	7474	13894	6180	7714	16395
NM_001012271	182	289	AMPL513992	BIRC5	69	14600	8146	5951	14493	8390	6103	17101.8
NM_001826	189	295	AMPL11851612	CKS1B	52	15239	7018	7797	15110	7212	7898	17829.9
NM_000179	3312	3416	AMPL4246748	MSH6	55	17876	8130	9409	17799	8278	9521	21002.9
NM_001255	512	621	AMPL11753453	CDC20	59	18387	9868	7793	18210	10260	7950	21487.9
NM_001641	761	871	AMPL11099164	APEX1	57	24056	9606	13102	23761	10066	13695	28038.1
NM_001798	931	1038	AMPL11968322	CDK2	52	24246	10832	12796	24187	11027	13160	28540.8
NM_005030	565	673	AMPL27296096	PLK1	51	24545	11104	11627	24194	11716	12478	28549
NM_001827	238	339	AMPL8076830	CKS2	40	25264	11293	13238	25094	11466	13628	29611
NM_031966	1413	1518	AMPL14157888	CCNB1	45	26024	11675	13631	25942	11941	14001	30611.7
NM_004336	702	803	AMPL29290680	BUB1	37	26043	11069	11845	25970	11344	14626	30644.7
NM_004701	987	1095	AMPL28634242	CCNB2	48	27840	12097	15088	27771	12281	15490	32769.9
NM_182649	720	821	AMPL20801767	PCNA	38	28188	12607	14815	27953	12791	15162	32984.7
NM_021873	2240	2344	AMPL35114157	CDC25B	58	32650	17509	14121	32576	18074	14502	38439.8
NM_001618	1872	1978	AMPL7740822	PARP1	56	37232	17561	17919	37120	18253	18867	43801.8
NM_001237	1392	1499	AMPL6726019	CCNA2	51	37402	17221	18728	37237	18088	19149	43939.8
NM_078467	422	530	AMPL18336733	CDKN1A	66	43078	18997	21774	42872	19906	22966	50589.2
NM_004725	567	669	AMPL27323746	BUB3	48	46165	22805	21390	46035	23363	22672	54321.5
NM_001469	583	686	AMPL8648783	XRCC6	58	48527	19792	24460	46971	20346	26625	55426
NM_021141	1430	1532	AMPL37189013	XRCC5	45	82267	42397	36577	81853	43724	38129	96587

## Sheet: A7966-48__S5B-116_X192.amplicon
contig_id	contig_srt	contig_end	region_id	gene_id	gc_count	overlaps	fwd_cov	rev_cov	total_reads	fwd_reads	rev_reads	RPM
NM_152438	344	448	AMPL36465175	DDX11	54	1	0	0	1	0	1	1.452
NM_003600	1195	1297	AMPL11289894	AURKA	56	33	1	0	33	33	0	47.921
NM_005938	767	876	AMPL29422390	FOXO4	59	218	126	92	218	126	92	316.57
NM_000077	667	772	AMPL4089136	CDKN2A	73	356	132	214	354	135	219	514.063
NM_134424	621	723	AMPL16353693	RAD52	47	583	277	294	579	280	299	840.797
NM_152463	1596	1704	AMPL34482490	EME1	59	734	467	245	729	478	251	1058.62
NM_001033855	707	814	AMPL3568418	DCLRE1C	45	748	414	300	744	431	313	1080.4
NM_022406	379	478	AMPL35402907	XRCC4	33	1012	482	485	1006	502	504	1460.87
NM_002439	3325	3426	AMPL8534199	MSH3	35	1133	559	547	1127	573	554	1636.58
NM_001238	1005	1106	AMPL7555808	CCNE1	44	1301	584	589	1236	616	620	1794.86
NM_000051	5632	5733	AMPL2143252	ATM	37	1372	581	754	1367	594	773	1985.1
NM_206937	98	198	AMPL21322264	LIG4	50	1815	814	933	1776	828	948	2579.03
NM_005431	147	251	AMPL28183476	XRCC2	40	1825	574	1174	1816	600	1216	2637.11
NM_001160243	555	662	AMPL10728693	RPAIN	69	1910	813	1045	1907	835	1072	2769.26
NM_001789	1202	1304	AMPL7718089	CDC25A	54	2095	1030	937	2080	1105	975	3020.48
NM_006591	1097	1198	AMPL13673431	POLD3	51	2132	1224	870	2123	1238	885	3082.92
NM_057749	886	986	AMPL16718891	CCNE2	36	2153	1225	870	2145	1258	887	3114.87
NM_002916	379	481	AMPL7035794	RFC4	44	2242	1033	1132	2222	1056	1166	3226.69
NM_000380	210	316	AMPL1942454	XPA	75	2301	1018	1210	2296	1052	1244	3334.15
NM_003884	784	882	AMPL27733081	KAT2B	55	2542	1051	1415	2533	1077	1456	3678.31
NM_002690	1037	1144	AMPL10972961	POLB	52	2577	1181	1326	2570	1209	1361	3732.04
NM_002519	3165	3271	AMPL8729376	NPAT	43	2618	1398	1125	2610	1445	1165	3790.12
NM_202001	191	295	AMPL21410533	ERCC1	66	3190	1433	1512	3175	1620	1555	4610.59
NM_001761	1114	1220	AMPL9291217	CCNF	68	3246	1638	1487	3232	1694	1538	4693.36
NM_001184	323	429	AMPL6698211	ATR	43	3500	1589	1836	3485	1626	1859	5060.76
NM_000123	3253	3356	AMPL5292234	ERCC5	47	3600	1436	2071	3593	1467	2126	5217.59
NM_013975	1698	1798	AMPL26036433	LIG3	57	3677	1869	1703	3673	1922	1751	5333.76
NM_130398	1057	1162	AMPL16067344	EXO1	43	3849	1566	2125	3842	1654	2188	5579.18
NM_006297	1116	1223	AMPL27997545	XRCC1	69	4701	2494	2122	4694	2527	2167	6816.41
NM_007300	4881	4985	AMPL13649775	BRCA1	52	4866	2040	2724	4853	2093	2760	7047.31
NM_005483	1792	1897	AMPL26958519	CHAF1A	67	4911	2137	1534	4901	2221	2680	7117.01
NM_002875	776	883	AMPL10470661	RAD51	57	5137	2692	2303	5120	2770	2350	7435.03
NM_001786	242	344	AMPL7721438	CDK1	40	5413	2722	2504	5396	2811	2585	7835.82
NM_001813	4643	4742	AMPL8434722	CENPE	28	5429	2520	2692	5414	2645	2769	7861.96
NM_005484	731	838	AMPL29573348	PARP2	44	5500	2905	2473	5476	2965	2511	7952
NM_000400	97	201	AMPL2905825	ERCC2	64	6231	3422	2566	6210	3545	2665	9017.88
NM_005441	1710	1815	AMPL27852026	CHAF1B	59	6298	2801	3266	6276	2897	3379	9113.72
NM_000546	1250	1356	AMPL3223250	TP53	61	6538	3201	3176	6521	3274	3247	9469.5
NM_004628	1063	1169	AMPL29984686	XPC	51	6725	3032	3451	6695	3108	3587	9722.17
NM_001100118	299	395	AMPL3903442	XRCC3	44	7565	3697	3653	7537	3806	3731	10944.9
NM_000489	5267	5369	AMPL3809384	ATRX	38	7767	4364	3234	7746	4471	3275	11248.4
NM_001826	189	295	AMPL11851612	CKS1B	52	8121	4207	3730	8073	4303	3770	11723.2
NM_001211	2129	2235	AMPL10744784	BUB1B	50	8233	3678	4305	8204	3757	4447	11913.5
NM_005225	895	1004	AMPL29253382	E2F1	59	8518	4176	3830	8379	4331	4048	12167.6
NM_000234	1789	1896	AMPL1296023	LIG1	60	8681	4042	3594	8665	4201	4464	12582.9
NM_001012271	182	289	AMPL513992	BIRC5	69	8847	5281	3317	8804	5404	3400	12784.8
NM_002497	852	947	AMPL9881690	NEK2	34	8944	4371	4363	8901	4455	4446	12925.6
NM_000251	1120	1223	AMPL4542401	MSH2	41	9100	3955	4779	9050	4142	4908	13142
NM_000943	176	282	AMPL4556695	PPIC	61	10015	3797	5924	9974	3863	6111	14483.8
NM_001255	512	621	AMPL11753453	CDC20	59	10122	5940	3823	10070	6179	3891	14623.2
NM_002485	1218	1319	AMPL11472616	NBN	40	12136	7131	4386	12080	7569	4511	17542
NM_005180	414	514	AMPL27860015	BMI1	50	13781	4700	5982	12592	6259	6333	18285.5
NM_001827	238	339	AMPL8076830	CKS2	40	13412	5993	7059	13331	6088	7243	19358.7
NM_000179	3312	3416	AMPL4246748	MSH6	55	13485	6225	7033	13448	6331	7117	19528.6
NM_005030	565	673	AMPL27296096	PLK1	51	13922	5960	6961	13768	6285	7483	19993.3
NM_001237	1392	1499	AMPL6726019	CCNA2	51	15047	7634	6757	14968	8064	6904	21735.8
NM_031966	1413	1518	AMPL14157888	CCNB1	45	15323	7283	7616	15268	7415	7853	22171.5
NM_001798	931	1038	AMPL11968322	CDK2	52	17575	7281	9824	17543	7412	10131	25475.1
NM_006904	12226	12332	AMPL13027983	PRKDC	56	17906	8203	9109	17868	8561	9307	25947.1
NM_004336	702	803	AMPL29290680	BUB1	37	20579	8384	10230	20524	8574	11950	29804
NM_021873	2240	2344	AMPL35114157	CDC25B	58	21293	10809	9803	21248	11212	10036	30855.4
NM_182649	720	821	AMPL20801767	PCNA	38	21357	9413	11579	21282	9534	11748	30904.8
NM_004701	987	1095	AMPL28634242	CCNB2	48	23562	10759	12309	23500	10904	12596	34125.6
NM_001641	761	871	AMPL11099164	APEX1	57	26914	12098	13656	26782	12582	14200	38891.6
NM_001618	1872	1978	AMPL7740822	PARP1	56	26953	12664	13090	26879	13127	13752	39032.5
NM_004725	567	669	AMPL27323746	BUB3	48	41310	22267	17636	41204	22723	18481	59834.6
NM_001469	583	686	AMPL8648783	XRCC6	58	48790	18224	25892	47104	18663	28441	68402.3
NM_078467	422	530	AMPL18336733	CDKN1A	66	54081	24706	26444	53886	25872	28014	78250.8
NM_021141	1430	1532	AMPL37189013	XRCC5	45	66216	35446	28167	65926	36595	29331	95734.7

## Sheet: A7966-49__S5B-116_X005.amplicon
contig_id	contig_srt	contig_end	region_id	gene_id	gc_count	overlaps	fwd_cov	rev_cov	total_reads	fwd_reads	rev_reads	RPM
NM_152438	344	448	AMPL36465175	DDX11	54	4	0	0	4	0	4	5.621
NM_003600	1195	1297	AMPL11289894	AURKA	56	25	1	0	25	24	1	35.13
NM_005938	767	876	AMPL29422390	FOXO4	59	395	196	193	395	200	195	555.06
NM_000077	667	772	AMPL4089136	CDKN2A	73	472	241	224	471	245	226	661.856
NM_134424	621	723	AMPL16353693	RAD52	47	516	215	287	516	220	296	725.091
NM_022406	379	478	AMPL35402907	XRCC4	33	724	350	336	720	368	352	1011.75
NM_000051	5632	5733	AMPL2143252	ATM	37	872	363	478	866	374	492	1216.92
NM_001033855	707	814	AMPL3568418	DCLRE1C	45	967	463	468	964	488	476	1354.63
NM_152463	1596	1704	AMPL34482490	EME1	59	1060	548	487	1058	564	494	1486.72
NM_001238	1005	1106	AMPL7555808	CCNE1	44	1363	739	523	1310	765	545	1840.83
NM_057749	886	986	AMPL16718891	CCNE2	36	1430	696	698	1422	714	708	1998.21
NM_206937	98	198	AMPL21322264	LIG4	50	1488	571	868	1465	583	882	2058.64
NM_002519	3165	3271	AMPL8729376	NPAT	43	1497	693	740	1485	712	773	2086.74
NM_002690	1037	1144	AMPL10972961	POLB	52	1697	884	774	1692	905	787	2377.62
NM_002439	3325	3426	AMPL8534199	MSH3	35	1776	659	1051	1770	680	1090	2487.23
NM_000380	210	316	AMPL1942454	XPA	75	1788	836	887	1784	867	917	2506.9
NM_001160243	555	662	AMPL10728693	RPAIN	69	1911	842	1023	1900	863	1037	2669.91
NM_003884	784	882	AMPL27733081	KAT2B	55	1906	794	1061	1902	811	1091	2672.72
NM_005431	147	251	AMPL28183476	XRCC2	40	2162	929	1169	2157	958	1199	3031.05
NM_007300	4881	4985	AMPL13649775	BRCA1	52	2443	1420	964	2436	1463	973	3423.1
NM_001789	1202	1304	AMPL7718089	CDC25A	54	2669	1165	1338	2653	1248	1405	3728.03
NM_002916	379	481	AMPL7035794	RFC4	44	2889	1305	1519	2877	1332	1545	4042.8
NM_001184	323	429	AMPL6698211	ATR	43	3211	1372	1768	3198	1399	1799	4493.88
NM_006591	1097	1198	AMPL13673431	POLD3	51	3298	2011	1239	3285	2035	1250	4616.13
NM_130398	1057	1162	AMPL16067344	EXO1	43	3341	1474	1737	3328	1537	1791	4676.56
NM_013975	1698	1798	AMPL26036433	LIG3	57	3448	1727	1636	3440	1775	1665	4833.94
NM_000123	3253	3356	AMPL5292234	ERCC5	47	3523	1417	2005	3514	1437	2077	4937.93
NM_006297	1116	1223	AMPL27997545	XRCC1	69	3833	2039	1724	3827	2065	1762	5377.76
NM_005441	1710	1815	AMPL27852026	CHAF1B	59	3974	1807	2074	3967	1846	2121	5574.49
NM_005484	731	838	AMPL29573348	PARP2	44	3991	2013	1907	3976	2047	1929	5587.13
NM_202001	191	295	AMPL21410533	ERCC1	66	4393	1573	2518	4386	1817	2569	6163.27
NM_001813	4643	4742	AMPL8434722	CENPE	28	5034	1882	3006	5017	1954	3063	7049.96
NM_001761	1114	1220	AMPL9291217	CCNF	68	5156	2470	2581	5149	2518	2631	7235.45
NM_001786	242	344	AMPL7721438	CDK1	40	5858	2641	3065	5852	2707	3145	8223.32
NM_002875	776	883	AMPL10470661	RAD51	57	6140	2998	2988	6124	3077	3047	8605.53
NM_005225	895	1004	AMPL29253382	E2F1	59	6848	3555	2924	6733	3644	3089	9461.31
NM_002497	852	947	AMPL9881690	NEK2	34	6766	2971	3644	6741	3032	3709	9472.55
NM_004628	1063	1169	AMPL29984686	XPC	51	6808	2757	3832	6786	2821	3965	9535.79
NM_001100118	299	395	AMPL3903442	XRCC3	44	7150	3374	3600	7134	3463	3671	10024.8
NM_000546	1250	1356	AMPL3223250	TP53	61	7331	3644	3552	7324	3705	3619	10291.8
NM_000400	97	201	AMPL2905825	ERCC2	64	7401	3696	3450	7371	3812	3559	10357.8
NM_005483	1792	1897	AMPL26958519	CHAF1A	67	7818	3676	2804	7808	3793	4015	10971.9
NM_001012271	182	289	AMPL513992	BIRC5	69	8196	3924	4047	8148	4017	4131	11449.7
NM_000489	5267	5369	AMPL3809384	ATRX	38	8431	4375	3907	8406	4462	3944	11812.2
NM_001211	2129	2235	AMPL10744784	BUB1B	50	8601	4045	4345	8564	4118	4446	12034.3
NM_000234	1789	1896	AMPL1296023	LIG1	60	8639	3947	4407	8620	4069	4551	12113
NM_002485	1218	1319	AMPL11472616	NBN	40	9363	4156	4802	9312	4371	4941	13085.4
NM_000251	1120	1223	AMPL4542401	MSH2	41	10371	4137	5928	10339	4257	6082	14528.5
NM_006904	12226	12332	AMPL13027983	PRKDC	56	12608	5674	6560	12573	5887	6686	17667.8
NM_005180	414	514	AMPL27860015	BMI1	50	13784	4906	6294	12617	6094	6523	17729.6
NM_000179	3312	3416	AMPL4246748	MSH6	55	13499	6824	6482	13467	6921	6546	18924
NM_031966	1413	1518	AMPL14157888	CCNB1	45	13817	6767	6727	13789	6868	6921	19376.5
NM_001826	189	295	AMPL11851612	CKS1B	52	13955	6494	7241	13903	6606	7297	19536.7
NM_000943	176	282	AMPL4556695	PPIC	61	14990	7319	7353	14945	7382	7563	21000.9
NM_001255	512	621	AMPL11753453	CDC20	59	15460	7106	7937	15389	7331	8058	21624.8
NM_004336	702	803	AMPL29290680	BUB1	37	16706	6593	9111	16669	6746	9923	23423.5
NM_005030	565	673	AMPL27296096	PLK1	51	16876	8054	7842	16757	8358	8399	23547.2
NM_001827	238	339	AMPL8076830	CKS2	40	17265	7996	8847	17167	8105	9062	24123.3
NM_004701	987	1095	AMPL28634242	CCNB2	48	17620	8765	8532	17586	8882	8704	24712.1
NM_001798	931	1038	AMPL11968322	CDK2	52	18919	7385	11098	18889	7505	11384	26543.1
NM_001641	761	871	AMPL11099164	APEX1	57	20885	8941	10812	20793	9231	11562	29218.6
NM_001237	1392	1499	AMPL6726019	CCNA2	51	22076	10003	11318	21996	10452	11544	30909.1
NM_182649	720	821	AMPL20801767	PCNA	38	24222	10669	13112	24144	10811	13333	33927.5
NM_021873	2240	2344	AMPL35114157	CDC25B	58	24807	12872	11257	24765	13261	11504	34800.1
NM_001618	1872	1978	AMPL7740822	PARP1	56	24963	11282	12683	24908	11667	13241	35001.1
NM_001469	583	686	AMPL8648783	XRCC6	58	40563	14386	22541	39176	14708	24468	55050.7
NM_004725	567	669	AMPL27323746	BUB3	48	49185	27595	20110	49091	28067	21024	68983.4
NM_078467	422	530	AMPL18336733	CDKN1A	66	61990	29037	29883	61791	30256	31535	86829.6
NM_021141	1430	1532	AMPL37189013	XRCC5	45	73203	37798	33262	72999	38724	34275	102579

[truncated: 14 more sheets: A7966-50__S5B-116_X006.amplicon, A7966-51__S5B-116_X007.amplicon, A7966-52__S5B-116_X008.amplicon, A7966-53__S5B-116_X009.amplicon, A7966-54__S5B-116_X010.amplicon, A7966-55__S5B-116_X011.amplicon, A7966-56__S5B-116_X012.amplicon, A7966-57__S5B-116_X013.amplicon, A7966-58__S5B-116_X014.amplicon, A7966-59__S5B-116_X015.amplicon, A7966-60__S5B-116_X016.amplicon, A7966-61__S5B-116_X017.amplicon, A7966-62__S5B-116_X018.amplicon, A7966-63__S5B-116_X019.amplicon]
